# Supplementary material
Source: PubMed Central journal article supplement (PMC3766955)
Supplement: NIHMS467319-supplement-1.pdf [file NIHMS467319-supplement-1.pdf]

## **Supplementary appendix**

This appendix formed part of the original submission and has been peer reviewed. We post it as supplied by the authors.

Supplement to: Schwartz GK, Tap WD, Qin L-X, et al. Cixutumumab and temsirolimus for patients with bone and soft-tissue sarcoma: a multicentre, open-label, phase 2 trial. *Lancet Oncol* 2013; published online March 8. [http://dx.doi.org/10.1016/S1470-2045\(13\)70049-4](http://dx.doi.org/10.1016/S1470-2045(13)70049-4)

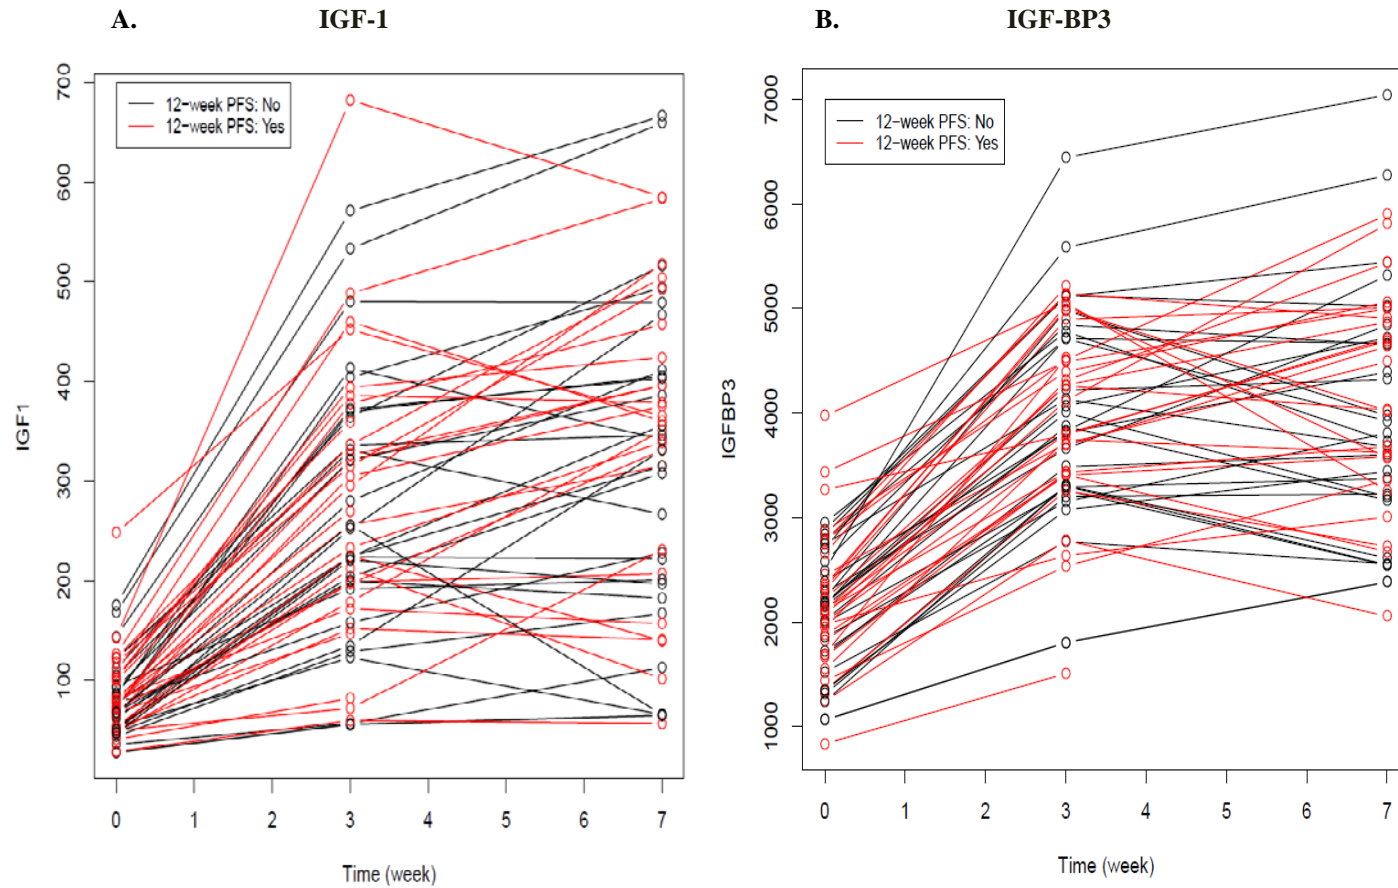

**Appendix, Figure 1. Plasma Biomarkers** Changes in plasma biomarker concentrations (pg/ml) on 55 patients for IGF-1 (A) and IGF-BP3 (B), according  $\geq 12$  weeks (yes, red line) or  $< 12$  weeks (no, black line) on study.

**Appendix Table. Adverse Events by Histology, Grade, Arm**

| Event Name                                             | Arm A<br>(N=57) | Arm B<br>(N=54) | Arm C<br>(N=63) |
|--------------------------------------------------------|-----------------|-----------------|-----------------|
| <b>Abdominal pain</b>                                  | <b>8</b>        | <b>1</b>        | <b>9</b>        |
| <b>Grade 1 &amp; 2</b>                                 | <b>6</b>        | <b>0</b>        | <b>9</b>        |
| Ewings                                                 | 0               | 0               | 2               |
| Chondro                                                | 0               | 0               | 0               |
| Osteo                                                  | 0               | 0               | 1               |
| LMS                                                    | 1               | 0               | 2               |
| Pleomorphic                                            | 1               | 0               | 0               |
| Synovial                                               | 0               | 0               | 0               |
| Other                                                  | 4               | 0               | 4               |
| <b>Grade 3 &amp; 4</b>                                 | <b>2</b>        | <b>1</b>        | <b>0</b>        |
| Ewings                                                 | 0               | 0               | 0               |
| Chondro                                                | 0               | 0               | 0               |
| Osteo                                                  | 0               | 1               | 0               |
| LMS                                                    | 1               | 0               | 0               |
| Pleomorphic                                            | 0               | 0               | 0               |
| Synovial                                               | 0               | 0               | 0               |
| Other                                                  | 1               | 0               | 0               |
| <b>Grade 5</b>                                         | <b>0</b>        | <b>0</b>        | <b>0</b>        |
| <b>Event Name</b>                                      | <b>Arm A</b>    | <b>Arm B</b>    | <b>Arm C</b>    |
| <b>Activated partial thromboplastin time prolonged</b> | <b>5</b>        | <b>6</b>        | <b>10</b>       |
| <b>Grade 1 &amp; 2</b>                                 | <b>4</b>        | <b>5</b>        | <b>8</b>        |
| Ewings                                                 | 0               | 1               | 2               |
| Chondro                                                | 0               | 1               | 2               |
| Osteo                                                  | 0               | 3               | 1               |
| LMS                                                    | 2               | 0               | 1               |
| Pleomorphic                                            | 0               | 0               | 1               |
| Synovial                                               | 0               | 0               | 0               |
| Other                                                  | 2               | 0               | 1               |
| <b>Grade 3 &amp; 4</b>                                 | <b>1</b>        | <b>1</b>        | <b>2</b>        |
| Ewings                                                 | 0               | 0               | 0               |
| Chondro                                                | 0               | 0               | 0               |
| Osteo                                                  | 0               | 1               | 0               |
| LMS                                                    | 0               | 0               | 1               |

|                                           |           |           |           |
|-------------------------------------------|-----------|-----------|-----------|
| Pleomorphic                               | 0         | 0         | 0         |
| Synovial                                  | 0         | 0         | 0         |
| Other                                     | 1         | 0         | 1         |
| <b>Event Name</b>                         |           |           |           |
| <b>Alanine aminotransferase increased</b> | <b>18</b> | <b>19</b> | <b>19</b> |
| <b>Grade 1 &amp; 2</b>                    | <b>18</b> | <b>19</b> | <b>18</b> |
| Ewings                                    | 0         | 7         | 3         |
| Chondro                                   | 0         | 4         | 2         |
| Osteo                                     | 0         | 5         | 0         |
| LMS                                       | 5         | 0         | 3         |
| Pleomorphic                               | 3         | 2         | 3         |
| Synovial                                  | 1         | 0         | 1         |
| Other                                     | 9         | 1         | 7         |
| <b>Grade 3 &amp; 4</b>                    | <b>0</b>  | <b>0</b>  | <b>1</b>  |
| Ewings                                    | 0         | 0         | 0         |
| Chondro                                   | 0         | 0         | 0         |
| Osteo                                     | 0         | 0         | 0         |
| LMS                                       | 0         | 0         | 0         |
| Pleomorphic                               | 0         | 0         | 0         |
| Synovial                                  | 0         | 0         | 0         |
| Other                                     | 0         | 0         | 1         |
| <b>Grade 5</b>                            | <b>0</b>  | <b>0</b>  | <b>0</b>  |
| <b>Event Name</b>                         |           |           |           |
| <b>Alkaline phosphatase increased</b>     | <b>16</b> | <b>19</b> | <b>20</b> |
| <b>Grade 1 &amp; 2</b>                    | <b>16</b> | <b>18</b> | <b>19</b> |
| Ewings                                    | 0         | 4         | 3         |
| Chondro                                   | 0         | 6         | 1         |
| Osteo                                     | 0         | 5         | 0         |
| LMS                                       | 6         | 0         | 3         |
| Pleomorphic                               | 3         | 1         | 2         |
| Synovial                                  | 1         | 0         | 1         |
| Other                                     | 6         | 1         | 9         |
| <b>Grade 3 &amp; 4</b>                    | <b>0</b>  | <b>1</b>  | <b>1</b>  |
| Ewings                                    | 0         | 0         | 0         |
| Chondro                                   | 0         | 1         | 0         |
| Osteo                                     | 0         | 0         | 1         |
| LMS                                       | 0         | 0         | 0         |
| Pleomorphic                               | 0         | 0         | 0         |
| Synovial                                  | 0         | 0         | 0         |
| Other                                     | 0         | 0         | 0         |
| <b>Grade 5</b>                            | <b>0</b>  | <b>0</b>  | <b>0</b>  |

| Event Name               | Arm A     | Arm B     | Arm C     |
|--------------------------|-----------|-----------|-----------|
| <b>Allergic rhinitis</b> | <b>3</b>  | <b>2</b>  | <b>7</b>  |
| <b>Grade 1 &amp; 2</b>   | <b>3</b>  | <b>2</b>  | <b>7</b>  |
| Ewings                   | 0         | 1         | 2         |
| Chondro                  | 0         | 0         | 1         |
| Osteo                    | 0         | 1         | 1         |
| LMS                      | 1         | 0         | 0         |
| Pleomorphic              | 0         | 0         | 2         |
| Synovial                 | 0         | 0         | 0         |
| Other                    | 2         | 0         | 1         |
| <b>Grade 3 &amp; 4</b>   | <b>0</b>  | <b>0</b>  | <b>0</b>  |
| <b>Grade 5</b>           | <b>0</b>  | <b>0</b>  | <b>0</b>  |
| Event Name               | Arm A     | Arm B     | Arm C     |
| <b>Alopecia</b>          | <b>6</b>  | <b>4</b>  | <b>5</b>  |
| <b>Grade 1 &amp; 2</b>   | <b>6</b>  | <b>4</b>  | <b>5</b>  |
| Ewings                   | 0         | 2         | 1         |
| Chondro                  | 0         | 1         | 0         |
| Osteo                    | 0         | 0         | 1         |
| LMS                      | 1         | 0         | 1         |
| Pleomorphic              | 0         | 0         | 1         |
| Synovial                 | 0         | 0         | 0         |
| Other                    | 5         | 1         | 1         |
| <b>Grade 3 &amp; 4</b>   | <b>0</b>  | <b>0</b>  | <b>0</b>  |
| <b>Grade 5</b>           | <b>0</b>  | <b>0</b>  | <b>0</b>  |
| Event Name               | Arm A     | Arm B     | Arm C     |
| <b>Anemia</b>            | <b>29</b> | <b>33</b> | <b>47</b> |
| <b>Grade 1 &amp; 2</b>   | <b>22</b> | <b>29</b> | <b>42</b> |
| Ewings                   | 0         | 7         | 7         |
| Chondro                  | 0         | 7         | 4         |
| Osteo                    | 0         | 12        | 6         |
| LMS                      | 5         | 0         | 7         |
| Pleomorphic              | 3         | 3         | 5         |
| Synovial                 | 1         | 0         | 1         |
| Other                    | 13        | 0         | 12        |
| <b>Grade 3 &amp; 4</b>   | <b>7</b>  | <b>4</b>  | <b>5</b>  |
| Ewings                   | 0         | 1         | 1         |
| Chondro                  | 0         | 0         | 1         |
| Osteo                    | 0         | 2         | 0         |
| LMS                      | 3         | 0         | 0         |
| Pleomorphic              | 1         | 0         | 3         |

|                        |              |              |           |
|------------------------|--------------|--------------|-----------|
| Synovial               | 0            | 0            | 0         |
| Other                  | 3            | 1            | 0         |
| <b>Grade 5</b>         | <b>0</b>     | <b>0</b>     | <b>0</b>  |
| <b>Event Name</b>      |              |              |           |
| <b>Arm A</b>           | <b>Arm B</b> | <b>Arm C</b> |           |
| <b>Anorexia</b>        | <b>24</b>    | <b>17</b>    | <b>27</b> |
| <b>Grade 1 &amp; 2</b> | <b>24</b>    | <b>17</b>    | <b>26</b> |
| Ewings                 | 1            | 6            | 2         |
| Chondro                | 0            | 4            | 1         |
| Osteo                  | 0            | 4            | 2         |
| LMS                    | 10           | 0            | 6         |
| Pleomorphic            | 3            | 1            | 4         |
| Synovial               | 0            | 0            | 1         |
| Other                  | 10           | 2            | 10        |
| <b>Grade 3 &amp; 4</b> | <b>0</b>     | <b>0</b>     | <b>1</b>  |
| Ewings                 | 0            | 0            | 0         |
| Chondro                | 0            | 0            | 0         |
| Osteo                  | 0            | 0            | 0         |
| LMS                    | 0            | 0            | 0         |
| Pleomorphic            | 0            | 0            | 0         |
| Synovial               | 0            | 0            | 0         |
| Other                  | 0            | 0            | 1         |
| <b>Grade 5</b>         | <b>0</b>     | <b>0</b>     | <b>0</b>  |
| <b>Event Name</b>      |              |              |           |
| <b>Arm A</b>           | <b>Arm B</b> | <b>Arm C</b> |           |
| <b>Anxiety</b>         | <b>4</b>     | <b>3</b>     | <b>8</b>  |
| <b>Grade 1 &amp; 2</b> | <b>4</b>     | <b>3</b>     | <b>8</b>  |
| Ewings                 | 0            | 2            | 0         |
| Chondro                | 0            | 0            | 0         |
| Osteo                  | 0            | 1            | 1         |
| LMS                    | 1            | 0            | 1         |
| Pleomorphic            | 1            | 0            | 2         |
| Synovial               | 0            | 0            | 1         |
| Other                  | 2            | 0            | 3         |
| <b>Grade 3 &amp; 4</b> | <b>0</b>     | <b>0</b>     | <b>0</b>  |
| <b>Grade 5</b>         | <b>0</b>     | <b>0</b>     | <b>0</b>  |
| <b>Event Name</b>      |              |              |           |
| <b>Arm A</b>           | <b>Arm B</b> | <b>Arm C</b> |           |
| <b>Arthralgia</b>      | <b>1</b>     | <b>5</b>     | <b>4</b>  |
| <b>Grade 1 &amp; 2</b> | <b>1</b>     | <b>5</b>     | <b>4</b>  |
| Ewings                 | 0            | 1            | 1         |

|                        |          |          |          |
|------------------------|----------|----------|----------|
| Chondro                | 0        | 1        | 0        |
| Osteo                  | 0        | 3        | 1        |
| LMS                    | 0        | 0        | 1        |
| Pleomorphic            | 1        | 0        | 0        |
| Synovial               | 0        | 0        | 0        |
| Other                  | 0        | 0        | 1        |
| <b>Grade 3 &amp; 4</b> | <b>0</b> | <b>0</b> | <b>0</b> |
| <b>Grade 5</b>         | <b>0</b> | <b>0</b> | <b>0</b> |

| <b>Event Name</b>                           | <b>Arm A</b> | <b>Arm B</b> | <b>Arm C</b> |
|---------------------------------------------|--------------|--------------|--------------|
| <b>Aspartate aminotransferase increased</b> | <b>18</b>    | <b>14</b>    | <b>18</b>    |
| <b>Grade 1 &amp; 2</b>                      | <b>17</b>    | <b>14</b>    | <b>17</b>    |
| Ewings                                      | 0            | 6            | 3            |
| Chondro                                     | 0            | 2            | 1            |
| Osteo                                       | 0            | 4            | 0            |
| LMS                                         | 3            | 0            | 3            |
| Pleomorphic                                 | 4            | 1            | 3            |
| Synovial                                    | 1            | 0            | 1            |
| Other                                       | 9            | 1            | 6            |
| <b>Grade 3 &amp; 4</b>                      | <b>1</b>     | <b>0</b>     | <b>1</b>     |
| Ewings                                      | 0            | 0            | 0            |
| Chondro                                     | 0            | 0            | 0            |
| Osteo                                       | 0            | 0            | 0            |
| LMS                                         | 0            | 0            | 0            |
| Pleomorphic                                 | 0            | 0            | 0            |
| Synovial                                    | 0            | 0            | 0            |
| Other                                       | 1            | 0            | 1            |
| <b>Grade 5</b>                              | <b>0</b>     | <b>0</b>     | <b>0</b>     |

| <b>Event Name</b>      | <b>Arm A</b> | <b>Arm B</b> | <b>Arm C</b> |
|------------------------|--------------|--------------|--------------|
| <b>Back pain</b>       | <b>11</b>    | <b>7</b>     | <b>14</b>    |
| <b>Grade 1 &amp; 2</b> | <b>10</b>    | <b>6</b>     | <b>14</b>    |
| Ewings                 | 0            | 1            | 2            |
| Chondro                | 0            | 3            | 0            |
| Osteo                  | 0            | 2            | 2            |
| LMS                    | 4            | 0            | 5            |
| Pleomorphic            | 0            | 0            | 0            |
| Synovial               | 0            | 0            | 0            |
| Other                  | 6            | 0            | 5            |
| <b>Grade 3 &amp; 4</b> | <b>1</b>     | <b>1</b>     | <b>0</b>     |

|                                  |          |          |          |
|----------------------------------|----------|----------|----------|
| Ewings                           | 0        | 1        | 0        |
| Chondro                          | 0        | 0        | 0        |
| Osteo                            | 0        | 0        | 0        |
| LMS                              | 0        | 0        | 0        |
| Pleomorphic                      | 0        | 0        | 0        |
| Synovial                         | 0        | 0        | 0        |
| Other                            | 1        | 0        | 0        |
| <b>Grade 5</b>                   | <b>0</b> | <b>0</b> | <b>0</b> |
| <b>Event Name</b>                |          |          |          |
| <b>Blood bilirubin increased</b> | <b>6</b> | <b>4</b> | <b>3</b> |
| <b>Grade 1 &amp; 2</b>           | <b>6</b> | <b>4</b> | <b>3</b> |
| Ewings                           | 0        | 1        | 0        |
| Chondro                          | 1        | 0        | 1        |
| Osteo                            | 0        | 3        | 0        |
| LMS                              | 1        | 0        | 1        |
| Pleomorphic                      | 1        | 0        | 0        |
| Synovial                         | 0        | 0        | 0        |
| Other                            | 3        | 0        | 1        |
| <b>Grade 3 &amp; 4</b>           | <b>0</b> | <b>0</b> | <b>0</b> |
| <b>Grade 5</b>                   | <b>0</b> | <b>0</b> | <b>0</b> |
| <b>Event Name</b>                |          |          |          |
| <b>Bruising</b>                  | <b>3</b> | <b>2</b> | <b>4</b> |
| <b>Grade 1 &amp; 2</b>           | <b>3</b> | <b>2</b> | <b>4</b> |
| Ewings                           | 0        | 0        | 0        |
| Chondro                          | 0        | 1        | 0        |
| Osteo                            | 0        | 1        | 1        |
| LMS                              | 0        | 0        | 1        |
| Pleomorphic                      | 0        | 0        | 1        |
| Synovial                         | 0        | 0        | 0        |
| Other                            | 3        | 0        | 1        |
| <b>Grade 3 &amp; 4</b>           | <b>0</b> | <b>0</b> | <b>0</b> |
| <b>Grade 5</b>                   | <b>0</b> | <b>0</b> | <b>0</b> |
| <b>Event Name</b>                |          |          |          |
| <b>Chest wall pain</b>           | <b>4</b> | <b>4</b> | <b>6</b> |
| <b>Grade 1 &amp; 2</b>           | <b>4</b> | <b>4</b> | <b>6</b> |
| Ewings                           | 0        | 0        | 0        |
| Chondro                          | 1        | 1        | 0        |
| Osteo                            | 0        | 2        | 0        |



|                        |          |          |          |
|------------------------|----------|----------|----------|
| LMS                    | 0        | 0        | 1        |
| Pleomorphic            | 0        | 0        | 3        |
| Synovial               | 0        | 0        | 0        |
| Other                  | 3        | 1        | 2        |
| <b>Grade 3 &amp; 4</b> | <b>0</b> | <b>0</b> | <b>0</b> |
| <b>Grade 5</b>         | <b>0</b> | <b>0</b> | <b>0</b> |

| Event Name             | Arm A    | Arm B    | Arm C    |
|------------------------|----------|----------|----------|
| <b>Chills</b>          | <b>5</b> | <b>3</b> | <b>3</b> |
| <b>Grade 1 &amp; 2</b> | <b>4</b> | <b>3</b> | <b>3</b> |
| Ewings                 | 0        | 0        | 0        |
| Chondro                | 0        | 1        | 0        |
| Osteo                  | 0        | 1        | 0        |
| LMS                    | 1        | 0        | 2        |
| Pleomorphic            | 1        | 0        | 0        |
| Synovial               | 1        | 0        | 0        |
| Other                  | 1        | 1        | 1        |
| <b>Grade 3 &amp; 4</b> | <b>1</b> | <b>0</b> | <b>0</b> |
| Ewings                 | 0        | 0        | 0        |
| Chondro                | 0        | 0        | 0        |
| Osteo                  | 0        | 0        | 0        |
| LMS                    | 1        | 0        | 0        |
| Pleomorphic            | 0        | 0        | 0        |
| Synovial               | 0        | 0        | 0        |
| Other                  | 0        | 0        | 0        |
| <b>Grade 5</b>         | <b>0</b> | <b>0</b> | <b>0</b> |

| Event Name              | Arm A    | Arm B    | Arm C    |
|-------------------------|----------|----------|----------|
| <b>Cholesterol high</b> | <b>5</b> | <b>3</b> | <b>3</b> |
| <b>Grade 1 &amp; 2</b>  | <b>4</b> | <b>3</b> | <b>3</b> |
| Ewings                  | 0        | 0        | 0        |
| Chondro                 | 0        | 1        | 0        |
| Osteo                   | 0        | 1        | 0        |
| LMS                     | 1        | 0        | 2        |
| Pleomorphic             | 1        | 0        | 0        |
| Synovial                | 1        | 0        | 0        |
| Other                   | 1        | 1        | 1        |
| <b>Grade 3 &amp; 4</b>  | <b>1</b> | <b>0</b> | <b>0</b> |
| Ewings                  | 0        | 0        | 0        |
| Chondro                 | 0        | 0        | 0        |
| Osteo                   | 0        | 0        | 0        |

|                |          |          |          |
|----------------|----------|----------|----------|
| LMS            | 1        | 0        | 0        |
| Pleomorphic    | 0        | 0        | 0        |
| Synovial       | 0        | 0        | 0        |
| Other          | 0        | 0        | 0        |
| <b>Grade 5</b> | <b>0</b> | <b>0</b> | <b>0</b> |

| Event Name             | Arm A     | Arm B     | Arm C     |
|------------------------|-----------|-----------|-----------|
| <b>Constipation</b>    | <b>20</b> | <b>18</b> | <b>25</b> |
| <b>Grade 1 &amp; 2</b> | <b>20</b> | <b>18</b> | <b>25</b> |
| Ewings                 | 1         | 6         | 3         |
| Chondro                | 1         | 4         | 3         |
| Osteo                  | 0         | 4         | 1         |
| LMS                    | 5         | 0         | 4         |
| Pleomorphic            | 1         | 1         | 3         |
| Synovial               | 0         | 0         | 1         |
| Other                  | 12        | 3         | 10        |
| <b>Grade 3 &amp; 4</b> | <b>0</b>  | <b>0</b>  | <b>0</b>  |
| <b>Grade 5</b>         | <b>0</b>  | <b>0</b>  | <b>0</b>  |

| Event Name             | Arm A     | Arm B     | Arm C     |
|------------------------|-----------|-----------|-----------|
| <b>Cough</b>           | <b>13</b> | <b>12</b> | <b>20</b> |
| <b>Grade 1 &amp; 2</b> | <b>12</b> | <b>11</b> | <b>20</b> |
| Ewings                 | 0         | 3         | 4         |
| Chondro                | 0         | 2         | 1         |
| Osteo                  | 0         | 3         | 1         |
| LMS                    | 3         | 0         | 3         |
| Pleomorphic            | 0         | 2         | 3         |
| Synovial               | 1         | 0         | 0         |
| Other                  | 8         | 1         | 8         |
| <b>Grade 3 &amp; 4</b> | <b>1</b>  | <b>1</b>  | <b>0</b>  |
| Ewings                 | 0         | 1         | 0         |
| Chondro                | 0         | 0         | 0         |
| Osteo                  | 0         | 0         | 0         |
| LMS                    | 0         | 0         | 0         |
| Pleomorphic            | 1         | 0         | 0         |
| Synovial               | 0         | 0         | 0         |
| Other                  | 0         | 0         | 0         |
| <b>Grade 5</b>         | <b>0</b>  | <b>0</b>  | <b>0</b>  |

| Event Name | Arm A | Arm B | Arm C |
|------------|-------|-------|-------|
|------------|-------|-------|-------|

|                             |              |              |              |
|-----------------------------|--------------|--------------|--------------|
| <b>Creatinine increased</b> | <b>14</b>    | <b>16</b>    | <b>15</b>    |
| <b>Grade 1 &amp; 2</b>      | <b>13</b>    | <b>16</b>    | <b>15</b>    |
| Ewings                      | 0            | 4            | 3            |
| Chondro                     | 1            | 2            | 1            |
| Osteo                       | 0            | 7            | 0            |
| LMS                         | 6            | 0            | 3            |
| Pleomorphic                 | 2            | 2            | 3            |
| Synovial                    | 1            | 0            | 0            |
| Other                       | 3            | 1            | 5            |
| <b>Grade 3 &amp; 4</b>      | <b>1</b>     | <b>0</b>     | <b>0</b>     |
| Ewings                      | 0            | 0            | 0            |
| Chondro                     | 0            | 0            | 0            |
| Osteo                       | 0            | 0            | 0            |
| LMS                         | 0            | 0            | 0            |
| Pleomorphic                 | 0            | 0            | 0            |
| Synovial                    | 0            | 0            | 0            |
| Other                       | 1            | 0            | 0            |
| <b>Grade 5</b>              | <b>0</b>     | <b>0</b>     | <b>0</b>     |
| <b>Event Name</b>           |              |              |              |
|                             | <b>Arm A</b> | <b>Arm B</b> | <b>Arm C</b> |
| <b>Dehydration</b>          | <b>6</b>     | <b>3</b>     | <b>9</b>     |
| <b>Grade 1 &amp; 2</b>      | <b>6</b>     | <b>2</b>     | <b>8</b>     |
| Ewings                      | 0            | 1            | 0            |
| Chondro                     | 0            | 0            | 0            |
| Osteo                       | 0            | 1            | 1            |
| LMS                         | 3            | 0            | 2            |
| Pleomorphic                 | 0            | 0            | 2            |
| Synovial                    | 0            | 0            | 0            |
| Other                       | 3            | 0            | 3            |
| <b>Grade 3 &amp; 4</b>      | <b>0</b>     | <b>1</b>     | <b>1</b>     |
| Ewings                      | 0            | 0            | 0            |
| Chondro                     | 0            | 0            | 0            |
| Osteo                       | 0            | 0            | 1            |
| LMS                         | 0            | 0            | 0            |
| Pleomorphic                 | 0            | 1            | 0            |
| Synovial                    | 0            | 0            | 0            |
| Other                       | 0            | 0            | 0            |
| <b>Grade 5</b>              | <b>0</b>     | <b>0</b>     | <b>0</b>     |
| <b>Event Name</b>           |              |              |              |
|                             | <b>Arm A</b> | <b>Arm B</b> | <b>Arm C</b> |

|                        |          |          |          |
|------------------------|----------|----------|----------|
| <b>Depression</b>      | <b>5</b> | <b>8</b> | <b>5</b> |
| <b>Grade 1 &amp; 2</b> | <b>5</b> | <b>8</b> | <b>5</b> |
| Ewings                 | 0        | 2        | 0        |
| Chondro                | 0        | 2        | 0        |
| Osteo                  | 0        | 4        | 1        |
| LMS                    | 1        | 0        | 0        |
| Pleomorphic            | 0        | 0        | 0        |
| Synovial               | 0        | 0        | 0        |
| Other                  | 4        | 0        | 4        |
| <b>Grade 3 &amp; 4</b> | <b>0</b> | <b>0</b> | <b>0</b> |
| <b>Grade 5</b>         | <b>0</b> | <b>0</b> | <b>0</b> |

| <b>Event Name</b>      | <b>Arm A</b> | <b>Arm B</b> | <b>Arm C</b> |
|------------------------|--------------|--------------|--------------|
| <b>Diarrhea</b>        | <b>20</b>    | <b>15</b>    | <b>32</b>    |
| <b>Grade 1 &amp; 2</b> | <b>18</b>    | <b>14</b>    | <b>26</b>    |
| Ewings                 | 0            | 4            | 3            |
| Chondro                | 1            | 3            | 1            |
| Osteo                  | 0            | 5            | 2            |
| LMS                    | 4            | 0            | 6            |
| Pleomorphic            | 1            | 1            | 3            |
| Synovial               | 0            | 0            | 1            |
| Other                  | 12           | 1            | 10           |
| <b>Grade 3 &amp; 4</b> | <b>2</b>     | <b>1</b>     | <b>6</b>     |
| Ewings                 | 0            | 0            | 0            |
| Chondro                | 0            | 0            | 2            |
| Osteo                  | 0            | 1            | 1            |
| LMS                    | 1            | 0            | 1            |
| Pleomorphic            | 0            | 0            | 1            |
| Synovial               | 0            | 0            | 0            |
| Other                  | 1            | 0            | 1            |
| <b>Grade 5</b>         | <b>0</b>     | <b>0</b>     | <b>0</b>     |

| <b>Event Name</b>      | <b>Arm A</b> | <b>Arm B</b> | <b>Arm C</b> |
|------------------------|--------------|--------------|--------------|
| <b>Dizziness</b>       | <b>4</b>     | <b>4</b>     | <b>5</b>     |
| <b>Grade 1 &amp; 2</b> | <b>4</b>     | <b>4</b>     | <b>5</b>     |
| Ewings                 | 0            | 3            | 1            |
| Chondro                | 0            | 1            | 0            |
| Osteo                  | 0            | 0            | 2            |
| LMS                    | 2            | 0            | 1            |
| Pleomorphic            | 0            | 0            | 0            |

|                        |              |              |              |
|------------------------|--------------|--------------|--------------|
| Synovial               | 0            | 0            | 0            |
| Other                  | 2            | 0            | 1            |
| <b>Grade 3 &amp; 4</b> | <b>0</b>     | <b>0</b>     | <b>0</b>     |
| <b>Grade 5</b>         | <b>0</b>     | <b>0</b>     | <b>0</b>     |
| <b>Event Name</b>      |              |              |              |
| <b>Event Name</b>      | <b>Arm A</b> | <b>Arm B</b> | <b>Arm C</b> |
| <b>Dry mouth</b>       | <b>3</b>     | <b>5</b>     | <b>8</b>     |
| <b>Grade 1 &amp; 2</b> | <b>3</b>     | <b>5</b>     | <b>8</b>     |
| Ewings                 | 0            | 1            | 0            |
| Chondro                | 0            | 1            | 1            |
| Osteo                  | 0            | 1            | 0            |
| LMS                    | 0            | 0            | 2            |
| Pleomorphic            | 1            | 0            | 1            |
| Synovial               | 0            | 0            | 0            |
| Other                  | 2            | 2            | 4            |
| <b>Grade 3 &amp; 4</b> | <b>0</b>     | <b>0</b>     | <b>0</b>     |
| <b>Grade 5</b>         | <b>0</b>     | <b>0</b>     | <b>0</b>     |
| <b>Event Name</b>      |              |              |              |
| <b>Event Name</b>      | <b>Arm A</b> | <b>Arm B</b> | <b>Arm C</b> |
| <b>Dry skin</b>        | <b>14</b>    | <b>11</b>    | <b>9</b>     |
| <b>Grade 1 &amp; 2</b> | <b>14</b>    | <b>11</b>    | <b>9</b>     |
| Ewings                 | 0            | 3            | 1            |
| Chondro                | 1            | 2            | 0            |
| Osteo                  | 0            | 2            | 1            |
| LMS                    | 1            | 0            | 3            |
| Pleomorphic            | 2            | 2            | 2            |
| Synovial               | 1            | 0            | 0            |
| Other                  | 9            | 2            | 2            |
| <b>Grade 3 &amp; 4</b> | <b>0</b>     | <b>0</b>     | <b>0</b>     |
| <b>Grade 5</b>         | <b>0</b>     | <b>0</b>     | <b>0</b>     |
| <b>Event Name</b>      |              |              |              |
| <b>Event Name</b>      | <b>Arm A</b> | <b>Arm B</b> | <b>Arm C</b> |
| <b>Dysgeusia</b>       | <b>9</b>     | <b>9</b>     | <b>18</b>    |
| <b>Grade 1 &amp; 2</b> | <b>9</b>     | <b>9</b>     | <b>18</b>    |
| Ewings                 | 0            | 2            | 3            |
| Chondro                | 0            | 4            | 1            |
| Osteo                  | 0            | 1            | 1            |
| LMS                    | 3            | 0            | 5            |
| Pleomorphic            | 0            | 0            | 5            |
| Synovial               | 0            | 0            | 1            |
| Other                  | 6            | 2            | 2            |
| <b>Grade 3 &amp; 4</b> | <b>0</b>     | <b>0</b>     | <b>0</b>     |
| <b>Grade 5</b>         | <b>0</b>     | <b>0</b>     | <b>0</b>     |

| Event Name             | Arm A     | Arm B     | Arm C     |
|------------------------|-----------|-----------|-----------|
| <b>Dyspnea</b>         | <b>15</b> | <b>12</b> | <b>21</b> |
| <b>Grade 1 &amp; 2</b> | <b>15</b> | <b>11</b> | <b>19</b> |
| Ewings                 | 0         | 4         | 4         |
| Chondro                | 1         | 2         | 0         |
| Osteo                  | 0         | 4         | 2         |
| LMS                    | 1         | 0         | 3         |
| Pleomorphic            | 2         | 1         | 2         |
| Synovial               | 1         | 0         | 1         |
| Other                  | 10        | 0         | 7         |
| <b>Grade 3 &amp; 4</b> | <b>0</b>  | <b>1</b>  | <b>2</b>  |
| Ewings                 | 0         | 0         | 0         |
| Chondro                | 0         | 0         | 0         |
| Osteo                  | 0         | 0         | 0         |
| LMS                    | 0         | 0         | 0         |
| Pleomorphic            | 0         | 0         | 1         |
| Synovial               | 0         | 0         | 0         |
| Other                  | 0         | 1         | 1         |
| <b>Grade 5</b>         | <b>0</b>  | <b>0</b>  | <b>0</b>  |
| Event Name             | Arm A     | Arm B     | Arm C     |
| <b>Edema limbs</b>     | <b>7</b>  | <b>3</b>  | <b>10</b> |
| <b>Grade 1 &amp; 2</b> | <b>7</b>  | <b>3</b>  | <b>9</b>  |
| Ewings                 | 0         | 0         | 0         |
| Chondro                | 0         | 0         | 0         |
| Osteo                  | 0         | 2         | 1         |
| LMS                    | 2         | 0         | 3         |
| Pleomorphic            | 2         | 0         | 2         |
| Synovial               | 0         | 0         | 0         |
| Other                  | 3         | 1         | 3         |
| <b>Grade 3 &amp; 4</b> | <b>0</b>  | <b>0</b>  | <b>1</b>  |
| Ewings                 | 0         | 0         | 0         |
| Chondro                | 0         | 0         | 0         |
| Osteo                  | 0         | 0         | 0         |
| LMS                    | 0         | 0         | 0         |
| Pleomorphic            | 0         | 0         | 1         |
| Synovial               | 0         | 0         | 0         |
| Other                  | 0         | 0         | 0         |
| <b>Grade 5</b>         | <b>0</b>  | <b>0</b>  | <b>0</b>  |
| Event Name             | Arm A     | Arm B     | Arm C     |
| <b>Epistaxis</b>       | <b>11</b> | <b>9</b>  | <b>14</b> |
| <b>Grade 1 &amp; 2</b> | <b>11</b> | <b>9</b>  | <b>14</b> |
| Ewings                 | 0         | 2         | 2         |
| Chondro                | 0         | 1         | 1         |

|                        |              |              |           |
|------------------------|--------------|--------------|-----------|
| Osteo                  | 0            | 4            | 2         |
| LMS                    | 4            | 0            | 3         |
| Pleomorphic            | 0            | 1            | 5         |
| Synovial               | 2            | 0            | 0         |
| Other                  | 5            | 1            | 1         |
| <b>Grade 3 &amp; 4</b> | <b>0</b>     | <b>0</b>     | <b>0</b>  |
| <b>Grade 5</b>         | <b>0</b>     | <b>0</b>     | <b>0</b>  |
| <b>Event Name</b>      |              |              |           |
| <b>Arm A</b>           | <b>Arm B</b> | <b>Arm C</b> |           |
| <b>Fatigue</b>         | <b>33</b>    | <b>37</b>    | <b>44</b> |
| <b>Grade 1 &amp; 2</b> | <b>30</b>    | <b>35</b>    | <b>43</b> |
| Ewings                 | 1            | 9            | 5         |
| Chondro                | 1            | 9            | 4         |
| Osteo                  | 0            | 11           | 3         |
| LMS                    | 10           | 0            | 7         |
| Pleomorphic            | 2            | 3            | 8         |
| Synovial               | 1            | 0            | 2         |
| Other                  | 15           | 3            | 14        |
| <b>Grade 3 &amp; 4</b> | <b>3</b>     | <b>2</b>     | <b>1</b>  |
| Ewings                 | 0            | 1            | 0         |
| Chondro                | 0            | 1            | 0         |
| Osteo                  | 0            | 0            | 0         |
| LMS                    | 2            | 0            | 0         |
| Pleomorphic            | 1            | 0            | 0         |
| Synovial               | 0            | 0            | 0         |
| Other                  | 0            | 0            | 1         |
| <b>Grade 5</b>         | <b>0</b>     | <b>0</b>     | <b>0</b>  |
| <b>Event Name</b>      |              |              |           |
| <b>Arm A</b>           | <b>Arm B</b> | <b>Arm C</b> |           |
| <b>Fever</b>           | <b>12</b>    | <b>7</b>     | <b>10</b> |
| <b>Grade 1 &amp; 2</b> | <b>11</b>    | <b>6</b>     | <b>10</b> |
| Ewings                 | 1            | 2            | 1         |
| Chondro                | 0            | 3            | 2         |
| Osteo                  | 0            | 1            | 1         |
| LMS                    | 2            | 0            | 1         |
| Pleomorphic            | 1            | 0            | 2         |
| Synovial               | 1            | 0            | 0         |
| Other                  | 6            | 0            | 3         |
| <b>Grade 3 &amp; 4</b> | <b>1</b>     | <b>1</b>     | <b>0</b>  |
| Ewings                 | 0            | 0            | 0         |
| Chondro                | 0            | 0            | 0         |
| Osteo                  | 0            | 0            | 0         |
| LMS                    | 0            | 0            | 0         |
| Pleomorphic            | 0            | 0            | 0         |
| Synovial               | 0            | 0            | 0         |
| Other                  | 1            | 1            | 0         |

|                                        |              |              |              |
|----------------------------------------|--------------|--------------|--------------|
| <b>Grade 5</b>                         | <b>0</b>     | <b>0</b>     | <b>0</b>     |
| <b>Event Name</b>                      | <b>Arm A</b> | <b>Arm B</b> | <b>Arm C</b> |
| <b>Flu like symptoms</b>               | <b>4</b>     | <b>1</b>     | <b>3</b>     |
| <b>Grade 1 &amp; 2</b>                 | <b>4</b>     | <b>1</b>     | <b>3</b>     |
| Ewings                                 | 0            | 1            | 0            |
| Chondro                                | 0            | 0            | 1            |
| Osteo                                  | 0            | 0            | 0            |
| LMS                                    | 0            | 0            | 1            |
| Pleomorphic                            | 0            | 0            | 0            |
| Synovial                               | 2            | 0            | 0            |
| Other                                  | 2            | 0            | 1            |
| <b>Grade 3 &amp; 4</b>                 | <b>0</b>     | <b>0</b>     | <b>0</b>     |
| <b>Grade 5</b>                         | <b>0</b>     | <b>0</b>     | <b>0</b>     |
| <b>Event Name</b>                      | <b>Arm A</b> | <b>Arm B</b> | <b>Arm C</b> |
| <b>Gastroesophageal reflux disease</b> | <b>2</b>     | <b>0</b>     | <b>7</b>     |
| <b>Grade 1 &amp; 2</b>                 | <b>2</b>     | <b>0</b>     | <b>7</b>     |
| Ewings                                 | 0            | 0            | 0            |
| Chondro                                | 0            | 0            | 1            |
| Osteo                                  | 0            | 0            | 1            |
| LMS                                    | 0            | 0            | 2            |
| Pleomorphic                            | 0            | 0            | 0            |
| Synovial                               | 0            | 0            | 0            |
| Other                                  | 2            | 0            | 3            |
| <b>Grade 3 &amp; 4</b>                 | <b>0</b>     | <b>0</b>     | <b>0</b>     |
| <b>Grade 5</b>                         | <b>0</b>     | <b>0</b>     | <b>0</b>     |
| <b>Event Name</b>                      | <b>Arm A</b> | <b>Arm B</b> | <b>Arm C</b> |
| <b>Generalized muscle weakness</b>     | <b>3</b>     | <b>1</b>     | <b>3</b>     |
| <b>Grade 1 &amp; 2</b>                 | <b>3</b>     | <b>1</b>     | <b>3</b>     |
| Ewings                                 | 0            | 1            | 0            |
| Chondro                                | 0            | 0            | 0            |
| Osteo                                  | 0            | 0            | 1            |
| LMS                                    | 1            | 0            | 0            |
| Pleomorphic                            | 0            | 0            | 0            |
| Synovial                               | 1            | 0            | 0            |
| Other                                  | 1            | 0            | 2            |
| <b>Grade 3 &amp; 4</b>                 | <b>0</b>     | <b>0</b>     | <b>0</b>     |
| <b>Grade 5</b>                         | <b>0</b>     | <b>0</b>     | <b>0</b>     |
| <b>Event Name</b>                      | <b>Arm A</b> | <b>Arm B</b> | <b>Arm C</b> |
| <b>Headache</b>                        | <b>11</b>    | <b>13</b>    | <b>15</b>    |
| <b>Grade 1 &amp; 2</b>                 | <b>11</b>    | <b>13</b>    | <b>15</b>    |



|                        |          |          |          |
|------------------------|----------|----------|----------|
| Ewings                 | 0        | 2        | 3        |
| Chondro                | 0        | 3        | 0        |
| Osteo                  | 0        | 7        | 1        |
| LMS                    | 6        | 0        | 4        |
| Pleomorphic            | 0        | 1        | 3        |
| Synovial               | 1        | 0        | 2        |
| Other                  | 4        | 0        | 2        |
| <b>Grade 3 &amp; 4</b> | <b>0</b> | <b>0</b> | <b>0</b> |
| <b>Grade 5</b>         | <b>0</b> | <b>0</b> | <b>0</b> |

| Event Name             | Arm A    | Arm B    | Arm C    |
|------------------------|----------|----------|----------|
| <b>Hypercalcemia</b>   | <b>7</b> | <b>4</b> | <b>4</b> |
| <b>Grade 1 &amp; 2</b> | <b>7</b> | <b>4</b> | <b>4</b> |
| Ewings                 | 0        | 1        | 2        |
| Chondro                | 0        | 1        | 0        |
| Osteo                  | 0        | 1        | 0        |
| LMS                    | 4        | 0        | 1        |
| Pleomorphic            | 0        | 1        | 1        |
| Synovial               | 0        | 0        | 0        |
| Other                  | 3        | 0        | 0        |
| <b>Grade 3 &amp; 4</b> | <b>0</b> | <b>0</b> | <b>0</b> |
| <b>Grade 5</b>         | <b>0</b> | <b>0</b> | <b>0</b> |

| Event Name             | Arm A     | Arm B     | Arm C     |
|------------------------|-----------|-----------|-----------|
| <b>Hyperglycemia</b>   | <b>35</b> | <b>39</b> | <b>45</b> |
| <b>Grade 1 &amp; 2</b> | <b>28</b> | <b>35</b> | <b>38</b> |
| Ewings                 | 0         | 12        | 7         |
| Chondro                | 0         | 7         | 4         |
| Osteo                  | 0         | 13        | 0         |
| LMS                    | 10        | 0         | 7         |
| Pleomorphic            | 3         | 3         | 4         |
| Synovial               | 2         | 0         | 2         |
| Other                  | 13        | 0         | 14        |
| <b>Grade 3 &amp; 4</b> | <b>7</b>  | <b>4</b>  | <b>7</b>  |
| Ewings                 | 0         | 0         | 0         |
| Chondro                | 1         | 1         | 0         |
| Osteo                  | 0         | 2         | 1         |
| LMS                    | 1         | 0         | 1         |
| Pleomorphic            | 2         | 0         | 3         |
| Synovial               | 1         | 0         | 0         |
| Other                  | 2         | 1         | 2         |
| <b>Grade 5</b>         | <b>0</b>  | <b>0</b>  | <b>0</b>  |

| Event Name          | Arm A    | Arm B    | Arm C    |
|---------------------|----------|----------|----------|
| <b>Hyperkalemia</b> | <b>3</b> | <b>1</b> | <b>9</b> |

|                             |              |              |              |
|-----------------------------|--------------|--------------|--------------|
| <b>Grade 1 &amp; 2</b>      | <b>2</b>     | <b>1</b>     | <b>9</b>     |
| Ewings                      | 0            | 0            | 2            |
| Chondro                     | 0            | 0            | 0            |
| Osteo                       | 0            | 1            | 0            |
| LMS                         | 1            | 0            | 4            |
| Pleomorphic                 | 0            | 0            | 1            |
| Synovial                    | 0            | 0            | 0            |
| Other                       | 1            | 0            | 2            |
| <b>Grade 3 &amp; 4</b>      | <b>1</b>     | <b>0</b>     | <b>0</b>     |
| Ewings                      | 0            | 0            | 0            |
| Chondro                     | 0            | 0            | 0            |
| Osteo                       | 0            | 0            | 0            |
| LMS                         | 1            | 0            | 0            |
| Pleomorphic                 | 0            | 0            | 0            |
| Synovial                    | 0            | 0            | 0            |
| Other                       | 0            | 0            | 0            |
| <b>Grade 5</b>              | <b>0</b>     | <b>0</b>     | <b>0</b>     |
| <b>Event Name</b>           |              |              |              |
|                             | <b>Arm A</b> | <b>Arm B</b> | <b>Arm C</b> |
| <b>Hypernatremia</b>        | <b>3</b>     | <b>1</b>     | <b>8</b>     |
| <b>Grade 1 &amp; 2</b>      | <b>2</b>     | <b>1</b>     | <b>8</b>     |
| Ewings                      | 0            | 0            | 0            |
| Chondro                     | 0            | 0            | 1            |
| Osteo                       | 0            | 1            | 1            |
| LMS                         | 0            | 0            | 1            |
| Pleomorphic                 | 1            | 0            | 1            |
| Synovial                    | 0            | 0            | 0            |
| Other                       | 1            | 0            | 4            |
| <b>Grade 3 &amp; 4</b>      | <b>1</b>     | <b>0</b>     | <b>0</b>     |
| Ewings                      | 0            | 0            | 0            |
| Chondro                     | 0            | 0            | 0            |
| Osteo                       | 0            | 0            | 0            |
| LMS                         | 0            | 0            | 0            |
| Pleomorphic                 | 0            | 0            | 0            |
| Synovial                    | 0            | 0            | 0            |
| Other                       | 1            | 0            | 0            |
| <b>Grade 5</b>              | <b>0</b>     | <b>0</b>     | <b>0</b>     |
| <b>Event Name</b>           |              |              |              |
|                             | <b>Arm A</b> | <b>Arm B</b> | <b>Arm C</b> |
| <b>Hypertriglyceridemia</b> | <b>23</b>    | <b>26</b>    | <b>28</b>    |
| <b>Grade 1 &amp; 2</b>      | <b>19</b>    | <b>24</b>    | <b>26</b>    |
| Ewings                      | 0            | 8            | 4            |
| Chondro                     | 1            | 3            | 1            |
| Osteo                       | 0            | 10           | 3            |
| LMS                         | 2            | 0            | 5            |
| Pleomorphic                 | 2            | 2            | 4            |

|                        |          |          |          |
|------------------------|----------|----------|----------|
| Synovial               | 2        | 0        | 1        |
| Other                  | 12       | 1        | 8        |
| <b>Grade 3 &amp; 4</b> | <b>4</b> | <b>2</b> | <b>2</b> |
| Ewings                 | 0        | 0        | 2        |
| Chondro                | 0        | 1        | 0        |
| Osteo                  | 0        | 1        | 0        |
| LMS                    | 2        | 0        | 0        |
| Pleomorphic            | 1        | 0        | 0        |
| Synovial               | 1        | 0        | 0        |
| Other                  | 0        | 0        | 0        |
| <b>Grade 5</b>         | <b>0</b> | <b>0</b> | <b>0</b> |

| Event Name             | Arm A     | Arm B     | Arm C     |
|------------------------|-----------|-----------|-----------|
| <b>Hypoalbuminemia</b> | <b>16</b> | <b>13</b> | <b>16</b> |
| <b>Grade 1 &amp; 2</b> | <b>15</b> | <b>13</b> | <b>16</b> |
| Ewings                 | 0         | 2         | 0         |
| Chondro                | 0         | 4         | 3         |
| Osteo                  | 0         | 4         | 2         |
| LMS                    | 4         | 0         | 2         |
| Pleomorphic            | 1         | 2         | 3         |
| Synovial               | 1         | 0         | 0         |
| Other                  | 9         | 1         | 6         |
| <b>Grade 3 &amp; 4</b> | <b>1</b>  | <b>0</b>  | <b>0</b>  |
| Ewings                 | 0         | 0         | 0         |
| Chondro                | 0         | 0         | 0         |
| Osteo                  | 0         | 0         | 0         |
| LMS                    | 0         | 0         | 0         |
| Pleomorphic            | 0         | 0         | 0         |
| Synovial               | 0         | 0         | 0         |
| Other                  | 1         | 0         | 0         |
| <b>Grade 5</b>         | <b>0</b>  | <b>0</b>  | <b>0</b>  |

| Event Name             | Arm A     | Arm B    | Arm C     |
|------------------------|-----------|----------|-----------|
| <b>Hypocalcemia</b>    | <b>10</b> | <b>8</b> | <b>14</b> |
| <b>Grade 1 &amp; 2</b> | <b>10</b> | <b>7</b> | <b>12</b> |
| Ewings                 | 0         | 3        | 1         |
| Chondro                | 0         | 2        | 1         |
| Osteo                  | 0         | 2        | 2         |
| LMS                    | 2         | 0        | 4         |
| Pleomorphic            | 3         | 0        | 1         |
| Synovial               | 0         | 0        | 0         |
| Other                  | 5         | 1        | 3         |

|                        |          |          |          |
|------------------------|----------|----------|----------|
| <b>Grade 3 &amp; 4</b> | <b>0</b> | <b>1</b> | <b>2</b> |
| Ewings                 | 0        | 0        | 0        |
| Chondro                | 0        | 0        | 0        |
| Osteo                  | 0        | 1        | 0        |
| LMS                    | 0        | 0        | 0        |
| Pleomorphic            | 0        | 0        | 1        |
| Synovial               | 0        | 0        | 0        |
| Other                  | 0        | 0        | 1        |
| <b>Grade 5</b>         | <b>0</b> | <b>0</b> | <b>0</b> |

| Event Name             | Arm A    | Arm B    | Arm C    |
|------------------------|----------|----------|----------|
| <b>Hypoglycemia</b>    | <b>3</b> | <b>4</b> | <b>2</b> |
| <b>Grade 1 &amp; 2</b> | <b>3</b> | <b>4</b> | <b>2</b> |
| Ewings                 | 0        | 1        | 0        |
| Chondro                | 0        | 0        | 0        |
| Osteo                  | 0        | 2        | 0        |
| LMS                    | 0        | 0        | 1        |
| Pleomorphic            | 0        | 0        | 0        |
| Synovial               | 0        | 0        | 0        |
| Other                  | 3        | 1        | 1        |
| <b>Grade 3 &amp; 4</b> | <b>0</b> | <b>0</b> | <b>0</b> |
| <b>Grade 5</b>         | <b>0</b> | <b>0</b> | <b>0</b> |

| Event Name             | Arm A     | Arm B    | Arm C     |
|------------------------|-----------|----------|-----------|
| <b>Hypokalemia</b>     | <b>14</b> | <b>8</b> | <b>12</b> |
| <b>Grade 1 &amp; 2</b> | <b>12</b> | <b>7</b> | <b>11</b> |
| Ewings                 | 0         | 2        | 1         |
| Chondro                | 0         | 1        | 2         |
| Osteo                  | 0         | 3        | 1         |
| LMS                    | 3         | 0        | 0         |
| Pleomorphic            | 3         | 1        | 4         |
| Synovial               | 1         | 0        | 0         |
| Other                  | 5         | 0        | 3         |
| <b>Grade 3 &amp; 4</b> | <b>2</b>  | <b>1</b> | <b>1</b>  |
| Ewings                 | 0         | 0        | 0         |
| Chondro                | 0         | 0        | 0         |
| Osteo                  | 0         | 1        | 0         |
| LMS                    | 0         | 0        | 0         |
| Pleomorphic            | 0         | 0        | 0         |
| Synovial               | 0         | 0        | 0         |
| Other                  | 2         | 0        | 1         |
| <b>Grade 5</b>         | <b>0</b>  | <b>0</b> | <b>0</b>  |

| Event Name              | Arm A     | Arm B     | Arm C     |
|-------------------------|-----------|-----------|-----------|
| <b>Hyponatremia</b>     | <b>12</b> | <b>14</b> | <b>21</b> |
| <b>Grade 1 &amp; 2</b>  | <b>10</b> | <b>14</b> | <b>19</b> |
| Ewings                  | 0         | 5         | 4         |
| Chondro                 | 0         | 3         | 2         |
| Osteo                   | 0         | 3         | 3         |
| LMS                     | 2         | 0         | 4         |
| Pleomorphic             | 1         | 2         | 1         |
| Synovial                | 0         | 0         | 2         |
| Other                   | 7         | 1         | 3         |
| <b>Grade 3 &amp; 4</b>  | <b>2</b>  | <b>0</b>  | <b>2</b>  |
| Ewings                  | 0         | 0         | 0         |
| Chondro                 | 0         | 0         | 0         |
| Osteo                   | 0         | 0         | 0         |
| LMS                     | 1         | 0         | 0         |
| Pleomorphic             | 0         | 0         | 1         |
| Synovial                | 0         | 0         | 0         |
| Other                   | 1         | 0         | 1         |
| <b>Grade 5</b>          | <b>0</b>  | <b>0</b>  | <b>0</b>  |
|                         |           |           |           |
| Event Name              | Arm A     | Arm B     | Arm C     |
| <b>Hypophosphatemia</b> | <b>10</b> | <b>11</b> | <b>12</b> |
| <b>Grade 1 &amp; 2</b>  | <b>5</b>  | <b>7</b>  | <b>5</b>  |
| Ewings                  | 0         | 1         | 0         |
| Chondro                 | 0         | 1         | 2         |
| Osteo                   | 0         | 2         | 0         |
| LMS                     | 0         | 0         | 1         |
| Pleomorphic             | 1         | 2         | 1         |
| Synovial                | 0         | 0         | 0         |
| Other                   | 4         | 1         | 1         |
| <b>Grade 3 &amp; 4</b>  | <b>5</b>  | <b>4</b>  | <b>7</b>  |
| Ewings                  | 0         | 2         | 3         |
| Chondro                 | 0         | 0         | 0         |
| Osteo                   | 0         | 2         | 1         |
| LMS                     | 2         | 0         | 0         |
| Pleomorphic             | 1         | 0         | 1         |
| Synovial                | 0         | 0         | 0         |
| Other                   | 2         | 0         | 2         |
| <b>Grade 5</b>          | <b>0</b>  | <b>0</b>  | <b>0</b>  |
|                         |           |           |           |
| Event Name              | Arm A     | Arm B     | Arm C     |
| <b>Hypotension</b>      | <b>3</b>  | <b>2</b>  | <b>3</b>  |
| <b>Grade 1 &amp; 2</b>  | <b>3</b>  | <b>1</b>  | <b>3</b>  |
| Ewings                  | 0         | 1         | 1         |

|                        |          |          |           |
|------------------------|----------|----------|-----------|
| Chondro                | 0        | 0        | 0         |
| Osteo                  | 0        | 0        | 1         |
| LMS                    | 1        | 0        | 0         |
| Pleomorphic            | 0        | 0        | 0         |
| Synovial               | 0        | 0        | 0         |
| Other                  | 2        | 0        | 1         |
| <b>Grade 3 &amp; 4</b> | <b>0</b> | <b>1</b> | <b>0</b>  |
| Ewings                 | 0        | 0        | 0         |
| Chondro                | 0        | 0        | 0         |
| Osteo                  | 0        | 0        | 0         |
| LMS                    | 0        | 0        | 0         |
| Pleomorphic            | 0        | 1        | 0         |
| Synovial               | 0        | 0        | 0         |
| Other                  | 0        | 0        | 0         |
| <b>Grade 5</b>         | <b>0</b> | <b>0</b> | <b>0</b>  |
| <b>Event Name</b>      |          |          |           |
| <b>INR increased</b>   | <b>4</b> | <b>4</b> | <b>4</b>  |
| <b>Grade 1 &amp; 2</b> | <b>3</b> | <b>4</b> | <b>3</b>  |
| Ewings                 | 0        | 0        | 1         |
| Chondro                | 0        | 1        | 0         |
| Osteo                  | 0        | 3        | 0         |
| LMS                    | 0        | 0        | 1         |
| Pleomorphic            | 0        | 0        | 0         |
| Synovial               | 0        | 0        | 0         |
| Other                  | 3        | 0        | 1         |
| <b>Grade 3 &amp; 4</b> | <b>1</b> | <b>0</b> | <b>1</b>  |
| Ewings                 | 0        | 0        | 0         |
| Chondro                | 0        | 0        | 0         |
| Osteo                  | 0        | 0        | 0         |
| LMS                    | 1        | 0        | 1         |
| Pleomorphic            | 0        | 0        | 0         |
| Synovial               | 0        | 0        | 0         |
| Other                  | 0        | 0        | 0         |
| <b>Grade 5</b>         | <b>0</b> | <b>0</b> | <b>0</b>  |
| <b>Event Name</b>      |          |          |           |
| <b>Insomnia</b>        | <b>3</b> | <b>6</b> | <b>11</b> |
| <b>Grade 1 &amp; 2</b> | <b>3</b> | <b>6</b> | <b>11</b> |
| Ewings                 | 0        | 4        | 3         |
| Chondro                | 0        | 0        | 0         |
| Osteo                  | 0        | 2        | 3         |
| LMS                    | 1        | 0        | 0         |
| Pleomorphic            | 1        | 0        | 2         |
| Synovial               | 0        | 0        | 1         |
| Other                  | 1        | 0        | 2         |

|                                   |              |              |              |
|-----------------------------------|--------------|--------------|--------------|
| <b>Grade 3 &amp; 4</b>            | <b>0</b>     | <b>0</b>     | <b>0</b>     |
| <b>Grade 5</b>                    | <b>0</b>     | <b>0</b>     | <b>0</b>     |
| <b>Event Name</b>                 |              |              |              |
| <b>Lymphocyte count decreased</b> | <b>17</b>    | <b>13</b>    | <b>22</b>    |
| <b>Grade 1 &amp; 2</b>            | <b>8</b>     | <b>6</b>     | <b>13</b>    |
| Ewings                            | 0            | 1            | 1            |
| Chondro                           | 0            | 1            | 2            |
| Osteo                             | 0            | 3            | 2            |
| LMS                               | 3            | 0            | 0            |
| Pleomorphic                       | 2            | 1            | 2            |
| Synovial                          | 1            | 0            | 1            |
| Other                             | 2            | 0            | 5            |
| <b>Grade 3 &amp; 4</b>            | <b>9</b>     | <b>7</b>     | <b>9</b>     |
| Ewings                            | 0            | 3            | 1            |
| Chondro                           | 0            | 0            | 1            |
| Osteo                             | 0            | 4            | 1            |
| LMS                               | 2            | 0            | 3            |
| Pleomorphic                       | 2            | 0            | 1            |
| Synovial                          | 1            | 0            | 0            |
| Other                             | 4            | 0            | 2            |
| <b>Grade 5</b>                    | <b>0</b>     | <b>0</b>     | <b>0</b>     |
| <b>Event Name</b>                 |              |              |              |
| <b>Mucositis oral</b>             | <b>41</b>    | <b>36</b>    | <b>47</b>    |
| <b>Grade 1 &amp; 2</b>            | <b>36</b>    | <b>27</b>    | <b>42</b>    |
| Ewings                            | 0            | 11           | 6            |
| Chondro                           | 0            | 6            | 4            |
| Osteo                             | 0            | 7            | 3            |
| LMS                               | 10           | 0            | 9            |
| Pleomorphic                       | 4            | 2            | 5            |
| Synovial                          | 5            | 0            | 3            |
| Other                             | 17           | 1            | 12           |
| <b>Grade 3 &amp; 4</b>            | <b>5</b>     | <b>9</b>     | <b>5</b>     |
| Ewings                            | 0            | 1            | 0            |
| Chondro                           | 0            | 3            | 0            |
| Osteo                             | 0            | 4            | 0            |
| LMS                               | 1            | 0            | 0            |
| Pleomorphic                       | 0            | 0            | 3            |
| Synovial                          | 1            | 0            | 0            |
| Other                             | 3            | 1            | 2            |
| <b>Grade 5</b>                    | <b>0</b>     | <b>0</b>     | <b>0</b>     |
| <b>Event Name</b>                 |              |              |              |
|                                   | <b>Arm A</b> | <b>Arm B</b> | <b>Arm C</b> |

|                                                                        |              |              |              |
|------------------------------------------------------------------------|--------------|--------------|--------------|
| <b>Musculoskeletal and connective tissue disorder - Other, specify</b> | <b>2</b>     | <b>1</b>     | <b>6</b>     |
| <b>Grade 1 &amp; 2</b>                                                 | <b>2</b>     | <b>1</b>     | <b>6</b>     |
| Ewings                                                                 | 0            | 0            | 1            |
| Chondro                                                                | 0            | 1            | 0            |
| Osteo                                                                  | 0            | 0            | 0            |
| LMS                                                                    | 1            | 0            | 1            |
| Pleomorphic                                                            | 0            | 0            | 1            |
| Synovial                                                               | 0            | 0            | 0            |
| Other                                                                  | 1            | 0            | 3            |
| <b>Grade 3 &amp; 4</b>                                                 | <b>0</b>     | <b>0</b>     | <b>0</b>     |
| <b>Grade 5</b>                                                         | <b>0</b>     | <b>0</b>     | <b>0</b>     |
| <b>Event Name</b>                                                      |              |              |              |
|                                                                        | <b>Arm A</b> | <b>Arm B</b> | <b>Arm C</b> |
| <b>Myalgia</b>                                                         | 8            | 8            | 7            |
| <b>Grade 1 &amp; 2</b>                                                 | <b>8</b>     | <b>8</b>     | <b>7</b>     |
| Ewings                                                                 | 0            | 3            | 0            |
| Chondro                                                                | 0            | 2            | 0            |
| Osteo                                                                  | 0            | 1            | 1            |
| LMS                                                                    | 2            | 0            | 5            |
| Pleomorphic                                                            | 0            | 1            | 0            |
| Synovial                                                               | 0            | 0            | 0            |
| Other                                                                  | 6            | 1            | 1            |
| <b>Grade 3 &amp; 4</b>                                                 | <b>0</b>     | <b>0</b>     | <b>0</b>     |
| <b>Grade 5</b>                                                         | <b>0</b>     | <b>0</b>     | <b>0</b>     |
| <b>Event Name</b>                                                      |              |              |              |
|                                                                        | <b>Arm A</b> | <b>Arm B</b> | <b>Arm C</b> |
| <b>Nail infection</b>                                                  | 3            | 0            | 5            |
| <b>Grade 1 &amp; 2</b>                                                 | <b>3</b>     | <b>0</b>     | <b>5</b>     |
| Ewings                                                                 | 0            | 0            | 0            |
| Chondro                                                                | 0            | 0            | 0            |
| Osteo                                                                  | 0            | 0            | 1            |
| LMS                                                                    | 0            | 0            | 3            |
| Pleomorphic                                                            | 1            | 0            | 0            |
| Synovial                                                               | 0            | 0            | 0            |
| Other                                                                  | 2            | 0            | 1            |
| <b>Grade 3 &amp; 4</b>                                                 | <b>0</b>     | <b>0</b>     | <b>0</b>     |
| <b>Grade 5</b>                                                         | <b>0</b>     | <b>0</b>     | <b>0</b>     |
| <b>Event Name</b>                                                      |              |              |              |
|                                                                        | <b>Arm A</b> | <b>Arm B</b> | <b>Arm C</b> |
| <b>Nail ridging</b>                                                    | 2            | 2            | 4            |
| <b>Grade 1 &amp; 2</b>                                                 | <b>2</b>     | <b>2</b>     | <b>4</b>     |
| Ewings                                                                 | 0            | 1            | 0            |
| Chondro                                                                | 0            | 0            | 0            |



|                        |   |   |   |
|------------------------|---|---|---|
| Osteo                  | 0 | 1 | 1 |
| LMS                    | 0 | 0 | 1 |
| Pleomorphic            | 0 | 0 | 1 |
| Synovial               | 0 | 0 | 0 |
| Other                  | 2 | 0 | 1 |
| <b>Grade 3 &amp; 4</b> | 0 | 0 | 0 |
| <b>Grade 5</b>         | 0 | 0 | 0 |

| Event Name              | Arm A    | Arm B    | Arm C    |
|-------------------------|----------|----------|----------|
| <b>Nasal congestion</b> | <b>2</b> | <b>6</b> | <b>5</b> |
| <b>Grade 1 &amp; 2</b>  | <b>2</b> | <b>6</b> | <b>5</b> |
| Ewings                  | 0        | 2        | 2        |
| Chondro                 | 0        | 0        | 0        |
| Osteo                   | 0        | 2        | 1        |
| LMS                     | 0        | 0        | 1        |
| Pleomorphic             | 0        | 2        | 1        |
| Synovial                | 0        | 0        | 0        |
| Other                   | 2        | 0        | 0        |
| <b>Grade 3 &amp; 4</b>  | 0        | 0        | 0        |
| <b>Grade 5</b>          | 0        | 0        | 0        |

| Event Name             | Arm A     | Arm B     | Arm C     |
|------------------------|-----------|-----------|-----------|
| <b>Nausea</b>          | <b>20</b> | <b>20</b> | <b>24</b> |
| <b>Grade 1 &amp; 2</b> | <b>20</b> | <b>20</b> | <b>24</b> |
| Ewings                 | 1         | 8         | 3         |
| Chondro                | 0         | 2         | 1         |
| Osteo                  | 0         | 6         | 3         |
| LMS                    | 4         | 0         | 3         |
| Pleomorphic            | 2         | 1         | 3         |
| Synovial               | 2         | 0         | 1         |
| Other                  | 11        | 3         | 10        |
| <b>Grade 3 &amp; 4</b> | <b>0</b>  | <b>0</b>  | <b>0</b>  |
| <b>Grade 5</b>         | <b>0</b>  | <b>0</b>  | <b>0</b>  |

| Event Name                        | Arm A     | Arm B     | Arm C     |
|-----------------------------------|-----------|-----------|-----------|
| <b>Neutrophil count decreased</b> | <b>10</b> | <b>18</b> | <b>17</b> |
| <b>Grade 1 &amp; 2</b>            | <b>8</b>  | <b>13</b> | <b>13</b> |
| Ewings                            | 0         | 3         | 3         |
| Chondro                           | 0         | 2         | 1         |
| Osteo                             | 0         | 7         | 1         |
| LMS                               | 2         | 0         | 1         |
| Pleomorphic                       | 0         | 1         | 2         |
| Synovial                          | 1         | 0         | 1         |
| Other                             | 5         | 0         | 4         |

|                               |              |              |              |
|-------------------------------|--------------|--------------|--------------|
| <b>Grade 3 &amp; 4</b>        | 2            | 5            | 4            |
| Ewings                        | 0            | 2            | 2            |
| Chondro                       | 0            | 0            | 0            |
| Osteo                         | 0            | 2            | 0            |
| LMS                           | 1            | 0            | 1            |
| Pleomorphic                   | 0            | 1            | 0            |
| Synovial                      | 0            | 0            | 0            |
| Other                         | 1            | 0            | 1            |
| <b>Grade 5</b>                | <b>0</b>     | <b>0</b>     | <b>0</b>     |
| <b>Non-Cardiac Chest Pain</b> |              |              |              |
| <b>Event Name</b>             | <b>Arm A</b> | <b>Arm B</b> | <b>Arm C</b> |
| <b>Non-Cardiac Chest Pain</b> | <b>3</b>     | <b>5</b>     | <b>2</b>     |
| <b>Grade 1 &amp; 2</b>        | <b>3</b>     | <b>3</b>     | <b>2</b>     |
| Ewings                        | 0            | 2            | 0            |
| Chondro                       | 0            | 0            | 0            |
| Osteo                         | 0            | 0            | 0            |
| LMS                           | 2            | 0            | 0            |
| Pleomorphic                   | 0            | 0            | 0            |
| Synovial                      | 0            | 0            | 0            |
| Other                         | 1            | 1            | 2            |
| <b>Grade 3 &amp; 4</b>        | <b>0</b>     | <b>2</b>     | <b>0</b>     |
| Ewings                        | 0            | 2            | 0            |
| Chondro                       | 0            | 0            | 0            |
| Osteo                         | 0            | 0            | 0            |
| LMS                           | 0            | 0            | 0            |
| Pleomorphic                   | 0            | 0            | 0            |
| Synovial                      | 0            | 0            | 0            |
| Other                         | 0            | 0            | 0            |
| <b>Grade 5</b>                | <b>0</b>     | <b>0</b>     | <b>0</b>     |
| <b>Pain</b>                   |              |              |              |
| <b>Event Name</b>             | <b>Arm A</b> | <b>Arm B</b> | <b>Arm C</b> |
| <b>Pain</b>                   | <b>22</b>    | <b>23</b>    | <b>26</b>    |
| <b>Grade 1 &amp; 2</b>        | <b>20</b>    | <b>22</b>    | <b>26</b>    |
| Ewings                        | 0            | 4            | 4            |
| Chondro                       | 0            | 7            | 2            |
| Osteo                         | 0            | 7            | 1            |
| LMS                           | 5            | 0            | 7            |
| Pleomorphic                   | 1            | 2            | 4            |
| Synovial                      | 4            | 0            | 1            |
| Other                         | 10           | 2            | 7            |
| <b>Grade 3 &amp; 4</b>        | <b>2</b>     | <b>1</b>     | <b>0</b>     |
| Ewings                        | 0            | 1            | 0            |
| Chondro                       | 0            | 0            | 0            |
| Osteo                         | 0            | 0            | 0            |
| LMS                           | 1            | 0            | 0            |

|                            |              |              |          |
|----------------------------|--------------|--------------|----------|
| Pleomorphic                | 0            | 0            | 0        |
| Synovial                   | 0            | 0            | 0        |
| Other                      | 1            | 0            | 0        |
| <b>Grade 5</b>             | <b>0</b>     | <b>0</b>     | <b>0</b> |
| <b>Event Name</b>          |              |              |          |
| <b>Arm A</b>               | <b>Arm B</b> | <b>Arm C</b> |          |
| <b>Papulopustular rash</b> | <b>6</b>     | <b>2</b>     | <b>2</b> |
| <b>Grade 1 &amp; 2</b>     | <b>5</b>     | <b>2</b>     | <b>2</b> |
| Ewings                     | 0            | 0            | 2        |
| Chondro                    | 0            | 1            | 0        |
| Osteo                      | 0            | 1            | 0        |
| LMS                        | 0            | 0            | 0        |
| Pleomorphic                | 0            | 0            | 0        |
| Synovial                   | 1            | 0            | 0        |
| Other                      | 4            | 0            | 0        |
| <b>Grade 3 &amp; 4</b>     | <b>1</b>     | <b>0</b>     | <b>0</b> |
| Ewings                     | 0            | 0            | 0        |
| Chondro                    | 0            | 0            | 0        |
| Osteo                      | 0            | 0            | 0        |
| LMS                        | 0            | 0            | 0        |
| Pleomorphic                | 0            | 0            | 0        |
| Synovial                   | 1            | 0            | 0        |
| Other                      | 0            | 0            | 0        |
| <b>Grade 5</b>             | <b>0</b>     | <b>0</b>     | <b>0</b> |
| <b>Event Name</b>          |              |              |          |
| <b>Arm A</b>               | <b>Arm B</b> | <b>Arm C</b> |          |
| <b>Paresthesia</b>         | <b>2</b>     | <b>2</b>     | <b>5</b> |
| <b>Grade 1 &amp; 2</b>     | <b>2</b>     | <b>2</b>     | <b>5</b> |
| Ewings                     | 0            | 2            | 2        |
| Chondro                    | 0            | 0            | 0        |
| Osteo                      | 0            | 0            | 0        |
| LMS                        | 0            | 0            | 0        |
| Pleomorphic                | 0            | 0            | 1        |
| Synovial                   | 0            | 0            | 0        |
| Other                      | 2            | 0            | 2        |
| <b>Grade 3 &amp; 4</b>     | <b>0</b>     | <b>0</b>     | <b>0</b> |
| Ewings                     | 0            | 0            | 0        |
| Chondro                    | 0            | 0            | 0        |
| Osteo                      | 0            | 0            | 0        |
| LMS                        | 0            | 0            | 0        |
| Pleomorphic                | 0            | 0            | 0        |
| Synovial                   | 0            | 0            | 0        |
| Other                      | 0            | 0            | 0        |
| <b>Grade 5</b>             | <b>0</b>     | <b>0</b>     | <b>0</b> |

| Event Name                           | Arm A     | Arm B     | Arm C     |
|--------------------------------------|-----------|-----------|-----------|
| <b>Paronychia</b>                    | <b>4</b>  | <b>3</b>  | <b>3</b>  |
| <b>Grade 1 &amp; 2</b>               | <b>4</b>  | <b>3</b>  | <b>3</b>  |
| Ewings                               | 0         | 0         | 0         |
| Chondro                              | 0         | 3         | 0         |
| Osteo                                | 0         | 0         | 0         |
| LMS                                  | 0         | 0         | 3         |
| Pleomorphic                          | 0         | 0         | 0         |
| Synovial                             | 0         | 0         | 0         |
| Other                                | 4         | 0         | 0         |
| <b>Grade 3 &amp; 4</b>               | <b>0</b>  | <b>0</b>  | <b>0</b>  |
| Ewings                               | 0         | 0         | 0         |
| Chondro                              | 0         | 0         | 0         |
| Osteo                                | 0         | 0         | 0         |
| LMS                                  | 0         | 0         | 0         |
| Pleomorphic                          | 0         | 0         | 0         |
| Synovial                             | 0         | 0         | 0         |
| Other                                | 0         | 0         | 0         |
| <b>Grade 5</b>                       | <b>0</b>  | <b>0</b>  | <b>0</b>  |
| Event Name                           | Arm A     | Arm B     | Arm C     |
| <b>Peripheral Sensory Neuropathy</b> | <b>5</b>  | <b>7</b>  | <b>9</b>  |
| <b>Grade 1 &amp; 2</b>               | <b>5</b>  | <b>7</b>  | <b>9</b>  |
| Ewings                               | 0         | 2         | 0         |
| Chondro                              | 0         | 2         | 1         |
| Osteo                                | 0         | 0         | 1         |
| LMS                                  | 1         | 0         | 3         |
| Pleomorphic                          | 1         | 2         | 0         |
| Synovial                             | 0         | 0         | 0         |
| Other                                | 3         | 1         | 4         |
| <b>Grade 3 &amp; 4</b>               | <b>0</b>  | <b>0</b>  | <b>0</b>  |
| Ewings                               | 0         | 0         | 0         |
| Chondro                              | 0         | 0         | 0         |
| Osteo                                | 0         | 0         | 0         |
| LMS                                  | 0         | 0         | 0         |
| Pleomorphic                          | 0         | 0         | 0         |
| Synovial                             | 0         | 0         | 0         |
| Other                                | 0         | 0         | 0         |
| <b>Grade 5</b>                       | <b>0</b>  | <b>0</b>  | <b>0</b>  |
| Event Name                           | Arm A     | Arm B     | Arm C     |
| <b>Platelet Count Decreased</b>      | <b>33</b> | <b>37</b> | <b>41</b> |
| <b>Grade 1 &amp; 2</b>               | <b>30</b> | <b>30</b> | <b>32</b> |

|                        |          |          |          |
|------------------------|----------|----------|----------|
| Ewings                 | 1        | 9        | 5        |
| Chondro                | 0        | 8        | 2        |
| Osteo                  | 0        | 11       | 3        |
| LMS                    | 6        | 0        | 8        |
| Pleomorphic            | 2        | 2        | 3        |
| Synovial               | 3        | 0        | 1        |
| Other                  | 18       | 0        | 10       |
| <b>Grade 3 &amp; 4</b> | <b>3</b> | <b>7</b> | <b>9</b> |
| Ewings                 | 0        | 3        | 2        |
| Chondro                | 0        | 0        | 1        |
| Osteo                  | 0        | 4        | 2        |
| LMS                    | 2        | 0        | 0        |
| Pleomorphic            | 1        | 0        | 2        |
| Synovial               | 0        | 0        | 0        |
| Other                  | 0        | 0        | 2        |
| <b>Grade 5</b>         | <b>0</b> | <b>0</b> | <b>0</b> |

| Event Name             | Arm A     | Arm B    | Arm C     |
|------------------------|-----------|----------|-----------|
| <b>Pruritus</b>        | <b>11</b> | <b>5</b> | <b>12</b> |
| <b>Grade 1 &amp; 2</b> | <b>11</b> | <b>5</b> | <b>12</b> |
| Ewings                 | 0         | 1        | 2         |
| Chondro                | 0         | 3        | 1         |
| Osteo                  | 0         | 1        | 1         |
| LMS                    | 1         | 0        | 4         |
| Pleomorphic            | 1         | 0        | 2         |
| Synovial               | 1         | 0        | 0         |
| Other                  | 8         | 0        | 2         |
| <b>Grade 3 &amp; 4</b> | <b>0</b>  | <b>0</b> | <b>0</b>  |
| Ewings                 | 0         | 0        | 0         |
| Chondro                | 0         | 0        | 0         |
| Osteo                  | 0         | 0        | 0         |
| LMS                    | 0         | 0        | 0         |
| Pleomorphic            | 0         | 0        | 0         |
| Synovial               | 0         | 0        | 0         |
| Other                  | 0         | 0        | 0         |
| <b>Grade 5</b>         | <b>0</b>  | <b>0</b> | <b>0</b>  |

| Event Name             | Arm A    | Arm B     | Arm C     |
|------------------------|----------|-----------|-----------|
| <b>Rash Acneiform</b>  | <b>2</b> | <b>13</b> | <b>12</b> |
| <b>Grade 1 &amp; 2</b> | <b>2</b> | <b>13</b> | <b>12</b> |
| Ewings                 | 0        | 4         | 2         |
| Chondro                | 0        | 2         | 1         |
| Osteo                  | 0        | 7         | 1         |
| LMS                    | 2        | 0         | 3         |

|                           |              |              |              |
|---------------------------|--------------|--------------|--------------|
| Pleomorphic               | 0            | 0            | 3            |
| Synovial                  | 0            | 0            | 1            |
| Other                     | 0            | 0            | 1            |
| <b>Grade 3 &amp; 4</b>    | <b>0</b>     | <b>0</b>     | <b>0</b>     |
| Ewings                    | 0            | 0            | 0            |
| Chondro                   | 0            | 0            | 0            |
| Osteo                     | 0            | 0            | 0            |
| LMS                       | 0            | 0            | 0            |
| Pleomorphic               | 0            | 0            | 0            |
| Synovial                  | 0            | 0            | 0            |
| Other                     | 0            | 0            | 0            |
| <b>Grade 5</b>            | <b>0</b>     | <b>0</b>     | <b>0</b>     |
| <b>Event Name</b>         |              |              |              |
|                           | <b>Arm A</b> | <b>Arm B</b> | <b>Arm C</b> |
| <b>Rash Maculopapular</b> | <b>14</b>    | <b>12</b>    | <b>16</b>    |
| <b>Grade 1 &amp; 2</b>    | <b>12</b>    | <b>12</b>    | <b>16</b>    |
| Ewings                    | 0            | 2            | 4            |
| Chondro                   | 0            | 5            | 1            |
| Osteo                     | 0            | 3            | 1            |
| LMS                       | 1            | 0            | 3            |
| Pleomorphic               | 0            | 2            | 1            |
| Synovial                  | 1            | 0            | 1            |
| Other                     | 10           | 0            | 5            |
| <b>Grade 3 &amp; 4</b>    | <b>2</b>     | <b>0</b>     | <b>0</b>     |
| Ewings                    | 0            | 0            | 0            |
| Chondro                   | 0            | 0            | 0            |
| Osteo                     | 0            | 0            | 0            |
| LMS                       | 0            | 0            | 0            |
| Pleomorphic               | 1            | 0            | 0            |
| Synovial                  | 0            | 0            | 0            |
| Other                     | 1            | 0            | 0            |
| <b>Grade 5</b>            | <b>0</b>     | <b>0</b>     | <b>0</b>     |
| <b>Event Name</b>         |              |              |              |
|                           | <b>Arm A</b> | <b>Arm B</b> | <b>Arm C</b> |
| <b>Sinusitis</b>          | <b>2</b>     | <b>1</b>     | <b>5</b>     |
| <b>Grade 1 &amp; 2</b>    | <b>2</b>     | <b>1</b>     | <b>5</b>     |
| Ewings                    | 0            | 0            | 2            |
| Chondro                   | 0            | 0            | 0            |
| Osteo                     | 0            | 1            | 0            |
| LMS                       | 0            | 0            | 1            |
| Pleomorphic               | 1            | 0            | 1            |
| Synovial                  | 0            | 0            | 0            |
| Other                     | 1            | 0            | 1            |
| <b>Grade 3 &amp; 4</b>    | <b>0</b>     | <b>0</b>     | <b>0</b>     |

|                |          |          |          |
|----------------|----------|----------|----------|
| Ewings         | 0        | 0        | 0        |
| Chondro        | 0        | 0        | 0        |
| Osteo          | 0        | 0        | 0        |
| LMS            | 0        | 0        | 0        |
| Pleomorphic    | 0        | 0        | 0        |
| Synovial       | 0        | 0        | 0        |
| Other          | 0        | 0        | 0        |
| <b>Grade 5</b> | <b>0</b> | <b>0</b> | <b>0</b> |

| Event Name             | Arm A    | Arm B    | Arm C    |
|------------------------|----------|----------|----------|
| <b>Skin Infection</b>  | <b>4</b> | <b>3</b> | <b>6</b> |
| <b>Grade 1 &amp; 2</b> | <b>4</b> | <b>3</b> | <b>6</b> |
| Ewings                 | 0        | 1        | 0        |
| Chondro                | 0        | 1        | 0        |
| Osteo                  | 0        | 0        | 0        |
| LMS                    | 1        | 0        | 2        |
| Pleomorphic            | 0        | 0        | 3        |
| Synovial               | 0        | 0        | 0        |
| Other                  | 3        | 1        | 1        |
| <b>Grade 3 &amp; 4</b> | <b>0</b> | <b>0</b> | <b>0</b> |
| Ewings                 | 0        | 0        | 0        |
| Chondro                | 0        | 0        | 0        |
| Osteo                  | 0        | 0        | 0        |
| LMS                    | 0        | 0        | 0        |
| Pleomorphic            | 0        | 0        | 0        |
| Synovial               | 0        | 0        | 0        |
| Other                  | 0        | 0        | 0        |
| <b>Grade 5</b>         | <b>0</b> | <b>0</b> | <b>0</b> |

| Event Name             | Arm A    | Arm B    | Arm C    |
|------------------------|----------|----------|----------|
| <b>Sore Throat</b>     | <b>6</b> | <b>4</b> | <b>6</b> |
| <b>Grade 1 &amp; 2</b> | <b>6</b> | <b>4</b> | <b>6</b> |
| Ewings                 | 0        | 2        | 0        |
| Chondro                | 0        | 1        | 1        |
| Osteo                  | 0        | 1        | 1        |
| LMS                    | 2        | 0        | 2        |
| Pleomorphic            | 2        | 0        | 0        |
| Synovial               | 0        | 0        | 0        |
| Other                  | 2        | 0        | 2        |
| <b>Grade 3 &amp; 4</b> | <b>0</b> | <b>0</b> | <b>0</b> |
| Ewings                 | 0        | 0        | 0        |
| Chondro                | 0        | 0        | 0        |
| Osteo                  | 0        | 0        | 0        |
| LMS                    | 0        | 0        | 0        |
| Pleomorphic            | 0        | 0        | 0        |

|                                    |              |              |              |
|------------------------------------|--------------|--------------|--------------|
| Synovial                           | 0            | 0            | 0            |
| Other                              | 0            | 0            | 0            |
| <b>Grade 5</b>                     | <b>0</b>     | <b>0</b>     | <b>0</b>     |
| <b>Upper Respiratory Infection</b> |              |              |              |
| <b>Event Name</b>                  | <b>Arm A</b> | <b>Arm B</b> | <b>Arm C</b> |
| <b>Upper Respiratory Infection</b> | <b>2</b>     | <b>2</b>     | <b>5</b>     |
| <b>Grade 1 &amp; 2</b>             | <b>2</b>     | <b>2</b>     | <b>5</b>     |
| Ewings                             | 0            | 1            | 0            |
| Chondro                            | 0            | 0            | 0            |
| Osteo                              | 0            | 1            | 1            |
| LMS                                | 1            | 0            | 1            |
| Pleomorphic                        | 0            | 0            | 2            |
| Synovial                           | 0            | 0            | 0            |
| Other                              | 1            | 0            | 1            |
| <b>Grade 3 &amp; 4</b>             | <b>0</b>     | <b>0</b>     | <b>0</b>     |
| Ewings                             | 0            | 0            | 0            |
| Chondro                            | 0            | 0            | 0            |
| Osteo                              | 0            | 0            | 0            |
| LMS                                | 0            | 0            | 0            |
| Pleomorphic                        | 0            | 0            | 0            |
| Synovial                           | 0            | 0            | 0            |
| Other                              | 0            | 0            | 0            |
| <b>Grade 5</b>                     | <b>0</b>     | <b>0</b>     | <b>0</b>     |
| <b>Urinary Tract Infection</b>     |              |              |              |
| <b>Event Name</b>                  | <b>Arm A</b> | <b>Arm B</b> | <b>Arm C</b> |
| <b>Urinary Tract Infection</b>     | <b>7</b>     | <b>2</b>     | <b>4</b>     |
| <b>Grade 1 &amp; 2</b>             | <b>5</b>     | <b>1</b>     | <b>3</b>     |
| Ewings                             | 0            | 0            | 1            |
| Chondro                            | 0            | 0            | 1            |
| Osteo                              | 0            | 1            | 0            |
| LMS                                | 3            | 0            | 0            |
| Pleomorphic                        | 1            | 0            | 0            |
| Synovial                           | 0            | 0            | 0            |
| Other                              | 1            | 0            | 1            |
| <b>Grade 3 &amp; 4</b>             | <b>2</b>     | <b>1</b>     | <b>1</b>     |
| Ewings                             | 0            | 0            | 0            |
| Chondro                            | 0            | 0            | 1            |
| Osteo                              | 0            | 1            | 0            |
| LMS                                | 0            | 0            | 0            |
| Pleomorphic                        | 1            | 0            | 0            |
| Synovial                           | 0            | 0            | 0            |
| Other                              | 1            | 0            | 0            |
| <b>Grade 5</b>                     | <b>0</b>     | <b>0</b>     | <b>0</b>     |



| Event Name                        | Arm A        | Arm B        | Arm C        |
|-----------------------------------|--------------|--------------|--------------|
| <b>Vomiting</b>                   | <b>16</b>    | <b>13</b>    | <b>14</b>    |
| <b>Grade 1 &amp; 2</b>            | <b>15</b>    | <b>13</b>    | <b>14</b>    |
| Ewings                            | 1            | 6            | 1            |
| Chondro                           | 0            | 3            | 0            |
| Osteo                             | 0            | 2            | 0            |
| LMS                               | 3            | 0            | 1            |
| Pleomorphic                       | 2            | 1            | 1            |
| Synovial                          | 3            | 0            | 2            |
| Other                             | 6            | 1            | 9            |
| <b>Grade 3 &amp; 4</b>            | <b>1</b>     | <b>0</b>     | <b>0</b>     |
| Ewings                            | 0            | 0            | 0            |
| Chondro                           | 0            | 0            | 0            |
| Osteo                             | 0            | 0            | 0            |
| LMS                               | 1            | 0            | 0            |
| Pleomorphic                       | 0            | 0            | 0            |
| Synovial                          | 0            | 0            | 0            |
| Other                             | 0            | 0            | 0            |
| <b>Grade 5</b>                    | <b>0</b>     | <b>0</b>     | <b>0</b>     |
| <b>Event Name</b>                 |              |              |              |
|                                   | <b>Arm A</b> | <b>Arm B</b> | <b>Arm C</b> |
| <b>Weight Loss</b>                | <b>10</b>    | <b>9</b>     | <b>22</b>    |
| <b>Grade 1 &amp; 2</b>            | <b>10</b>    | <b>9</b>     | <b>21</b>    |
| Ewings                            | 0            | 3            | 1            |
| Chondro                           | 0            | 1            | 1            |
| Osteo                             | 0            | 5            | 1            |
| LMS                               | 3            | 0            | 3            |
| Pleomorphic                       | 2            | 0            | 6            |
| Synovial                          | 0            | 0            | 1            |
| Other                             | 5            | 0            | 8            |
| <b>Grade 3 &amp; 4</b>            | <b>0</b>     | <b>0</b>     | <b>1</b>     |
| Ewings                            | 0            | 0            | 0            |
| Chondro                           | 0            | 0            | 0            |
| Osteo                             | 0            | 0            | 0            |
| LMS                               | 0            | 0            | 0            |
| Pleomorphic                       | 0            | 0            | 0            |
| Synovial                          | 0            | 0            | 0            |
| Other                             | 0            | 0            | 1            |
| <b>Grade 5</b>                    | <b>0</b>     | <b>0</b>     | <b>0</b>     |
| <b>Event Name</b>                 |              |              |              |
|                                   | <b>Arm A</b> | <b>Arm B</b> | <b>Arm C</b> |
| <b>White Blood Cell Decreased</b> | <b>26</b>    | <b>26</b>    | <b>32</b>    |
| <b>Grade 1 &amp; 2</b>            | <b>23</b>    | <b>24</b>    | <b>28</b>    |
| Ewings                            | 0            | 4            | 3            |

|                        |          |          |          |
|------------------------|----------|----------|----------|
| Chondro                | 0        | 7        | 4        |
| Osteo                  | 0        | 10       | 4        |
| LMS                    | 5        | 0        | 4        |
| Pleomorphic            | 3        | 3        | 5        |
| Synovial               | 2        | 0        | 1        |
| Other                  | 13       | 0        | 7        |
| <b>Grade 3 &amp; 4</b> | <b>3</b> | <b>2</b> | <b>4</b> |
| Ewings                 | 0        | 1        | 2        |
| Chondro                | 0        | 0        | 0        |
| Osteo                  | 0        | 1        | 0        |
| LMS                    | 1        | 0        | 2        |
| Pleomorphic            | 0        | 0        | 0        |
| Synovial               | 0        | 0        | 0        |
| Other                  | 2        | 0        | 0        |
| <b>Grade 5</b>         | <b>0</b> | <b>0</b> | <b>0</b> |
